# Supplementary material for: The Evolutionary Patterns of Genome Size in Ensifera (Insecta: Orthoptera)
Source: Front Genet. 2021 Jun 23;12:693541. doi: 10.3389/fgene.2021.693541 (PMC8261143; doi:10.3389/fgene.2021.693541)
Supplement: Supplementary file 1 [file Data_Sheet_1.XLSX]

## Sheet: table S1
Table S1 Collection information of specimens included in genome size estimations.
Superfamily	Family	Subfamily	Species	Na	Locality/Collection information
Tettigonioidea	Tettigoniidae	Conocephalinae	Ruspolia lineosa	12	Xi'an City, Shaanxi, China, E108.891746, N34.047453, August 2019; Ankang City, Shaanxi, China, E108.554942,N33.55356, September 2019
Tettigonioidea	Tettigoniidae	Conocephalinae	Ruspolia dubia	9	Hanzhong City, Shaanxi, China, E108.009856,N33.510105, July 2019；Xi'an City, Shaanxi, China, E108.902191,N34.158682, August 2019; Guilin City, Guangxi, China, E110.306458,N25.397826, September 2019
Tettigonioidea	Tettigoniidae	Conocephalinae	Pseudorhynchus crassiceps	6	Guilin City, Guangxi, China, E110.306458,N25.397826, September 2019
Tettigonioidea	Tettigoniidae	Conocephalinae	Conocephalus melaenus	5	Guilin City, Guangxi, China, E110.306458,N25.397826 and E110.380631,N25.300161, September 2019
Tettigonioidea	Tettigoniidae	Conocephalinae	Conocephalus gladiatus	16	Xi'an City, Shaanxi, China, E108.891746, N34.047453, 19 August 2019
Tettigonioidea	Tettigoniidae	Conocephalinae	Conocephalus maculatus	4	Guilin City, Guangxi, China, E110.380631,N25.300161, September 2019; Qiannan Buyi and Miao Autonomous Prefecture, Guizhou, China, E107.818364,N26.079632, September 2019
Tettigonioidea	Tettigoniidae	Tettigoniinae	Metrioptera bonneti	16	Hanzhong City, Shaanxi, China, E108.009856,N33.510105, July 2019; Weinan City, Shaanxi, China, E109.564261,N34.288791, August 2019
Tettigonioidea	Tettigoniidae	Tettigoniinae	Tettigonia chinensis	7	Hanzhong City, Shaanxi, China, E108.009856,N33.510105, July 2019; Weinan City, Shaanxi, China, E109.564261,N34.288791, August 2019
Tettigonioidea	Tettigoniidae	Tettigoniinae	Atlanticus sinensis	8	Hanzhong City, Shaanxi, China, E108.009856,N33.510105, July 2019; Xi'an City, Shaanxi, China, E108.891746, N34.047453 19 August 2019
Tettigonioidea	Tettigoniidae	Tettigoniinae	Gampsocleis sinensis	4	Hanzhong City, Shaanxi, China, E108.009856,N33.510105, July 2019
Tettigonioidea	Tettigoniidae	Phaneropterinae	Elimaea berezovskii	11	Hanzhong City, Shaanxi, China, E108.009856,N33.510105, July 2019
Tettigonioidea	Tettigoniidae	Phaneropterinae	Kuwayamaea brachyptera	16	Hanzhong City, Shaanxi, China, E108.009856,N33.510105, July 2019;Weinan City, Shaanxi, China, E109.564261,N34.288791, August 2019; Guilin City, Guangxi, China, E110.380631,N25.300161, September 2019
Tettigonioidea	Tettigoniidae	Phaneropterinae	Phaneroptera gracilis	14	Xi'an City, Shaanxi, China, E108.891746,N34.047453 and E108.902191,N34.158682, August 2019; Guilin City, Guangxi, China, E110.306458,N25.397826, September 2019
Tettigonioidea	Tettigoniidae	Phaneropterinae	Ruidocollaris sinensis	4	Hanzhong City, Shaanxi, China, E108.009856,N33.510105, July 2019
Tettigonioidea	Tettigoniidae	Phaneropterinae	Ducetia japonica	8	Guilin City, Guangxi, China, E110.306458,N25.397826, September 2019
Tettigonioidea	Tettigoniidae	Bradyporinae	Zichya tenggerensis	9	Ulanqab City, Inner Mongolia, China, E112.954417,N41.031723, August 2019
Tettigonioidea	Tettigoniidae	Bradyporinae	Deracantha onos	11	Ulanqab City, Inner Mongolia, China, E112.954417,N41.031723, August 2019
Tettigonioidea	Tettigoniidae	Meconematinae	Microconema clavata	4	Weinan City, Shaanxi, China, E109.564261,N34.288791, August 2019
Tettigonioidea	Tettigoniidae	Pseudophyllinae	Tegra novaehollandiae viridinotata	3	Guilin City, Guangxi, China, E110.306458,N25.397826, September 2019
Tettigonioidea	Tettigoniidae	Pseudophyllinae	Phyllomimus sinicus	3	Guilin City, Guangxi, China, E110.306458,N25.397826, September 2019
Tettigonioidea	Tettigoniidae	Mecopodinae	Mecopoda elongata	13	Guilin City, Guangxi, China, E110.380631,N25.300161, September 2019; Qiannan Buyi and Miao Autonomous Prefecture, Guizhou, China, E107.818364,N26.079632, September 2019
Tettigonioidea	Tettigoniidae	Hexacentrinae	Hexacentrus unicolor	8	Hanzhong City, Shaanxi, China, E108.009856,N33.510105, July 2019
Gryllotalpoidea	Gryllotalpidae	Gryllotalpinae	Gryllotalpa orientalis	6	Xi'an City, Shaanxi, China, E108.902191,N34.158682, August 2019
Grylloidea	Gryllidae	Gryllinae	Teleogryllus emma	13	Xi'an City, Shaanxi, China, E108.891746, N34.047453 and E108.902191,N34.158682, August 2019
Grylloidea	Gryllidae	Gryllinae	Loxoblemmus equestris	4	Ankang City, Shaanxi, China, E108.554942,N33.55356, September 2019
Grylloidea	Gryllidae	Gryllinae	Gryllodes sigillatus	7	Guilin City, Guangxi, China, E110.306458,N25.397826, September 2019
Grylloidea	Gryllidae	Eneopterinae	Xenogryllus marmoratus	8	Guilin City, Guangxi, China, E110.306458,N25.397826, September 2019
Grylloidea	Gryllidae	Podoscirtinae	Truljalia hibinonis	4	Guilin City, Guangxi, China, E110.380631,N25.300161, September 2019
Grylloidea	Gryllidae	Oecanthinae	Oecanthus sinensis	5	Weinan City, Shaanxi, China, E109.564261,N34.288791, August 2019
Grylloidea	Mogoplistidae	Mogoplistinae	Ornebius kanetataki	6	Guilin City, Guangxi, China, E110.306458,N25.397826, September 2019
Stenopelmatoidea	Gryllacrididae	Gryllacridinae	Ocellarnaca sp.	5	Weinan City, Shaanxi, China, E109.564261,N34.288791, August 2019
Rhaphidophoroidea	Rhaphidophoridae	Aemodogryllinae	Diestrammena sp.	4	Xi'an City, Shaanxi, China, E108.902191,N34.158682, August 2019
Note: a Total number of males (females) per species.

## Sheet: table S2
Table S2 Genome size estimates for specimens used in this study.
Species	Internal standards	Sex	C value (pg)	Genome size (Gb)
Ruspolia lineosa	Periplaneta americana	female	9.6989	9.4855
Ruspolia lineosa	Periplaneta americana	female	9.6976	9.4843
Ruspolia lineosa	Periplaneta americana	female	10.2714	10.0454
Ruspolia lineosa	Periplaneta americana	female	10.22	9.9952
Ruspolia lineosa	Periplaneta americana	male	8.8089	8.6151
Ruspolia lineosa	Periplaneta americana	male	9.0043	8.8062
Ruspolia lineosa	Periplaneta americana	male	9.042	8.8431
Ruspolia lineosa	Periplaneta americana	male	9.3265	9.1213
Ruspolia lineosa	Gallus domesticus	female	9.5294	9.3198
Ruspolia lineosa	Gallus domesticus	female	9.5514	9.3413
Ruspolia lineosa	Gallus domesticus	male	8.9428	8.7461
Ruspolia lineosa	Gallus domesticus	male	9.4095	9.2025
Ruspolia dubia	Periplaneta americana	female	9.6007	9.3895
Ruspolia dubia	Periplaneta americana	female	9.5471	9.3371
Ruspolia dubia	Periplaneta americana	female	9.7692	9.5543
Ruspolia dubia	Periplaneta americana	female	10.111	9.8886
Ruspolia dubia	Periplaneta americana	female	9.8036	9.5879
Ruspolia dubia	Periplaneta americana	female	9.7686	9.5537
Ruspolia dubia	Periplaneta americana	male	9.0661	8.8666
Ruspolia dubia	Gallus domesticus	female	9.4186	9.2114
Ruspolia dubia	Gallus domesticus	female	9.4129	9.2058
Pseudorhynchus crassiceps	Periplaneta americana	female	10.0554	9.8342
Pseudorhynchus crassiceps	Periplaneta americana	female	10.049	9.8279
Pseudorhynchus crassiceps	Periplaneta americana	female	10.0366	9.8158
Pseudorhynchus crassiceps	Periplaneta americana	male	8.9124	8.7163
Pseudorhynchus crassiceps	Periplaneta americana	male	8.5733	8.3847
Pseudorhynchus crassiceps	Periplaneta americana	male	8.8312	8.6369
Conocephalus melaenus	Periplaneta americana	female	4.2073	4.1147
Conocephalus melaenus	Periplaneta americana	female	4.3388	4.2433
Conocephalus melaenus	Periplaneta americana	female	4.2219	4.129
Conocephalus melaenus	Gallus domesticus	female	4.343	4.2475
Conocephalus melaenus	Gallus domesticus	female	4.3946	4.2979
Conocephalus gladiatus	Periplaneta americana	female	4.427	4.3296
Conocephalus gladiatus	Periplaneta americana	female	4.4013	4.3045
Conocephalus gladiatus	Periplaneta americana	female	4.4073	4.3103
Conocephalus gladiatus	Periplaneta americana	female	4.4242	4.3269
Conocephalus gladiatus	Periplaneta americana	female	4.5915	4.4905
Conocephalus gladiatus	Periplaneta americana	female	4.4709	4.3725
Conocephalus gladiatus	Periplaneta americana	male	3.9648	3.8776
Conocephalus gladiatus	Periplaneta americana	male	4.0169	3.9285
Conocephalus gladiatus	Periplaneta americana	male	4.0005	3.9125
Conocephalus gladiatus	Gallus domesticus	female	4.6002	4.499
Conocephalus gladiatus	Gallus domesticus	female	4.6906	4.5874
Conocephalus gladiatus	Gallus domesticus	female	4.5386	4.4388
Conocephalus gladiatus	Gallus domesticus	female	4.862	4.755
Conocephalus gladiatus	Gallus domesticus	male	3.9902	3.9024
Conocephalus gladiatus	Gallus domesticus	male	4.0361	3.9473
Conocephalus gladiatus	Gallus domesticus	male	4.1295	4.0387
Conocephalus maculatus	Periplaneta americana	female	4.0835	3.9937
Conocephalus maculatus	Periplaneta americana	female	3.8933	3.8076
Conocephalus maculatus	Periplaneta americana	male	3.7082	3.6266
Conocephalus maculatus	Periplaneta americana	male	3.6662	3.5855
Metrioptera bonneti	Periplaneta americana	female	5.9095	5.7795
Metrioptera bonneti	Periplaneta americana	female	5.8348	5.7064
Metrioptera bonneti	Periplaneta americana	female	5.8367	5.7083
Metrioptera bonneti	Periplaneta americana	female	5.6217	5.498
Metrioptera bonneti	Periplaneta americana	male	5.3575	5.2396
Metrioptera bonneti	Periplaneta americana	male	5.1631	5.0495
Metrioptera bonneti	Periplaneta americana	male	5.2349	5.1197
Metrioptera bonneti	Periplaneta americana	male	5.2592	5.1435
Metrioptera bonneti	Gallus domesticus	female	5.8001	5.6725
Metrioptera bonneti	Gallus domesticus	female	5.8777	5.7484
Metrioptera bonneti	Gallus domesticus	female	6.138	6.003
Metrioptera bonneti	Gallus domesticus	female	6.1483	6.013
Metrioptera bonneti	Gallus domesticus	male	5.5315	5.4098
Metrioptera bonneti	Gallus domesticus	male	5.3549	5.2371
Metrioptera bonneti	Gallus domesticus	male	5.4977	5.3768
Metrioptera bonneti	Gallus domesticus	male	5.3136	5.1967
Tettigonia chinensis	Periplaneta americana	female	6.4591	6.317
Tettigonia chinensis	Periplaneta americana	female	6.4423	6.3006
Tettigonia chinensis	Periplaneta americana	female	6.545	6.401
Tettigonia chinensis	Periplaneta americana	female	6.519	6.3756
Tettigonia chinensis	Gallus domesticus	female	6.9953	6.8414
Tettigonia chinensis	Gallus domesticus	female	7.0022	6.8482
Tettigonia chinensis	Gallus domesticus	female	6.7962	6.6467
Atlanticus sinensis	Periplaneta americana	female	7.1153	6.9588
Atlanticus sinensis	Periplaneta americana	female	7.227	7.068
Atlanticus sinensis	Periplaneta americana	female	7.0407	6.8858
Atlanticus sinensis	Periplaneta americana	male	6.8126	6.6627
Atlanticus sinensis	Periplaneta americana	male	6.8594	6.7085
Atlanticus sinensis	Periplaneta americana	male	6.9247	6.7724
Atlanticus sinensis	Gallus domesticus	male	6.7698	6.6209
Atlanticus sinensis	Gallus domesticus	male	6.5342	6.3904
Gampsocleis sinensis	Periplaneta americana	female	6.6842	6.5371
Gampsocleis sinensis	Periplaneta americana	female	6.8411	6.6906
Gampsocleis sinensis	Gallus domesticus	female	6.8683	6.7172
Gampsocleis sinensis	Gallus domesticus	female	6.7417	6.5934
Elimaea berezovskii	Periplaneta americana	female	6.6151	6.4696
Elimaea berezovskii	Periplaneta americana	female	6.6916	6.5444
Elimaea berezovskii	Periplaneta americana	female	6.4544	6.3124
Elimaea berezovskii	Periplaneta americana	female	6.6203	6.4747
Elimaea berezovskii	Periplaneta americana	male	5.773	5.646
Elimaea berezovskii	Periplaneta americana	male	5.777	5.6499
Elimaea berezovskii	Periplaneta americana	male	5.7673	5.6404
Elimaea berezovskii	Gallus domesticus	female	6.9861	6.8324
Elimaea berezovskii	Gallus domesticus	female	6.7149	6.5672
Elimaea berezovskii	Gallus domesticus	male	6.0831	5.9493
Elimaea berezovskii	Gallus domesticus	male	6.3109	6.1721
Kuwayamaea brachyptera	Periplaneta americana	female	10.3059	10.0792
Kuwayamaea brachyptera	Periplaneta americana	female	10.3839	10.1555
Kuwayamaea brachyptera	Periplaneta americana	female	10.0678	9.8463
Kuwayamaea brachyptera	Periplaneta americana	male	9.1343	8.9333
Kuwayamaea brachyptera	Periplaneta americana	male	9.004	8.8059
Kuwayamaea brachyptera	Periplaneta americana	male	8.8833	8.6879
Kuwayamaea brachyptera	Periplaneta americana	male	8.9454	8.7486
Kuwayamaea brachyptera	Periplaneta americana	male	9.2196	9.0168
Kuwayamaea brachyptera	Gallus domesticus	female	11.0855	10.8416
Kuwayamaea brachyptera	Gallus domesticus	female	11.138	10.893
Kuwayamaea brachyptera	Gallus domesticus	female	10.9131	10.673
Kuwayamaea brachyptera	Gallus domesticus	female	10.1456	9.9224
Kuwayamaea brachyptera	Gallus domesticus	male	9.1939	8.9916
Kuwayamaea brachyptera	Gallus domesticus	male	9.0195	8.8211
Kuwayamaea brachyptera	Gallus domesticus	male	9.1823	8.9803
Kuwayamaea brachyptera	Gallus domesticus	male	8.912	8.7159
Phaneroptera gracilis	Periplaneta americana	female	6.1487	6.0134
Phaneroptera gracilis	Periplaneta americana	female	6.1704	6.0347
Phaneroptera gracilis	Periplaneta americana	female	6.0157	5.8834
Phaneroptera gracilis	Periplaneta americana	male	4.9636	4.8544
Phaneroptera gracilis	Periplaneta americana	male	5.2211	5.1062
Phaneroptera gracilis	Periplaneta americana	male	5.2809	5.1647
Phaneroptera gracilis	Periplaneta americana	male	5.1285	5.0157
Phaneroptera gracilis	Periplaneta americana	male	5.1262	5.0134
Phaneroptera gracilis	Periplaneta americana	male	5.0538	4.9426
Phaneroptera gracilis	Periplaneta americana	male	5.033	4.9223
Phaneroptera gracilis	Gallus domesticus	female	6.0632	5.9298
Phaneroptera gracilis	Gallus domesticus	female	6.1672	6.0315
Phaneroptera gracilis	Gallus domesticus	male	5.1141	5.0016
Phaneroptera gracilis	Gallus domesticus	male	4.9395	4.8308
Ruidocollaris sinensis	Periplaneta americana	female	7.032	6.8773
Ruidocollaris sinensis	Periplaneta americana	female	6.9711	6.8177
Ruidocollaris sinensis	Periplaneta americana	male	5.9898	5.858
Ruidocollaris sinensis	Periplaneta americana	male	6.0619	5.9285
Ducetia japonica	Periplaneta americana	female	7.9036	7.7297
Ducetia japonica	Periplaneta americana	female	8.1291	7.9503
Ducetia japonica	Periplaneta americana	female	7.6552	7.4868
Ducetia japonica	Periplaneta americana	female	7.6734	7.5046
Ducetia japonica	Periplaneta americana	male	6.7968	6.6473
Ducetia japonica	Periplaneta americana	male	6.87	6.7189
Ducetia japonica	Periplaneta americana	male	6.9446	6.7918
Ducetia japonica	Gallus domesticus	male	7.2784	7.1183
Zichya tenggerensis	Periplaneta americana	female	14.2821	13.9679
Zichya tenggerensis	Periplaneta americana	female	13.8067	13.503
Zichya tenggerensis	Periplaneta americana	male	12.5081	12.2329
Zichya tenggerensis	Periplaneta americana	male	12.2629	11.9931
Zichya tenggerensis	Periplaneta americana	male	13.0682	12.7807
Zichya tenggerensis	Periplaneta americana	male	12.9127	12.6286
Zichya tenggerensis	Gallus domesticus	female	13.9948	13.6869
Zichya tenggerensis	Gallus domesticus	female	13.7227	13.4208
Zichya tenggerensis	Gallus domesticus	male	12.7759	12.4948
Deracantha onos	Periplaneta americana	female	18.9992	18.5812
Deracantha onos	Periplaneta americana	female	18.5404	18.1325
Deracantha onos	Periplaneta americana	female	18.9963	18.5784
Deracantha onos	Periplaneta americana	male	17.5522	17.1661
Deracantha onos	Periplaneta americana	male	17.4547	17.0707
Deracantha onos	Periplaneta americana	male	17.6969	17.3076
Deracantha onos	Gallus domesticus	female	19.1838	18.7618
Deracantha onos	Gallus domesticus	female	19.4916	19.0628
Deracantha onos	Gallus domesticus	female	19.5989	19.1677
Deracantha onos	Gallus domesticus	male	17.0838	16.708
Deracantha onos	Gallus domesticus	male	17.179	16.8011
Microconema clavata	Gallus domesticus	female	4.4116	4.3145
Microconema clavata	Gallus domesticus	female	4.3424	4.2469
Microconema clavata	Gallus domesticus	male	4.0671	3.9776
Microconema clavata	Gallus domesticus	male	4.0123	3.924
Tegra novaehollandiae viridinotata	Gallus domesticus	female	3.4345	3.3589
Tegra novaehollandiae viridinotata	Gallus domesticus	female	3.62	3.5404
Tegra novaehollandiae viridinotata	Gallus domesticus	female	3.3633	3.2893
Phyllomimus sinicus	Periplaneta americana	female	5.8726	5.7434
Phyllomimus sinicus	Periplaneta americana	female	5.9132	5.7831
Phyllomimus sinicus	Periplaneta americana	female	5.9525	5.8215
Mecopoda elongata	Periplaneta americana	female	14.3723	14.0561
Mecopoda elongata	Periplaneta americana	female	14.3289	14.0137
Mecopoda elongata	Periplaneta americana	female	13.7185	13.4167
Mecopoda elongata	Periplaneta americana	male	13.4345	13.1389
Mecopoda elongata	Periplaneta americana	male	13.5292	13.2316
Mecopoda elongata	Periplaneta americana	male	13.1703	12.8806
Mecopoda elongata	Periplaneta americana	male	13.3554	13.0616
Mecopoda elongata	Periplaneta americana	male	13.0374	12.7506
Mecopoda elongata	Gallus domesticus	female	15.0033	14.6732
Mecopoda elongata	Gallus domesticus	female	14.5781	14.2574
Mecopoda elongata	Gallus domesticus	female	15.4846	15.1439
Mecopoda elongata	Gallus domesticus	male	13.9824	13.6748
Mecopoda elongata	Gallus domesticus	male	13.6641	13.3635
Hexacentrus unicolor	Periplaneta americana	female	13.8641	13.5591
Hexacentrus unicolor	Periplaneta americana	male	12.8407	12.5582
Hexacentrus unicolor	Periplaneta americana	male	12.1351	11.8681
Hexacentrus unicolor	Periplaneta americana	male	12.6308	12.3529
Hexacentrus unicolor	Periplaneta americana	male	12.6659	12.3873
Hexacentrus unicolor	Gallus domesticus	female	14.1522	13.8409
Hexacentrus unicolor	Gallus domesticus	male	13.6656	13.365
Hexacentrus unicolor	Gallus domesticus	male	12.8707	12.5875
Gryllotalpa orientalis	Periplaneta americana	female	4.3378	4.2424
Gryllotalpa orientalis	Periplaneta americana	female	4.3268	4.2316
Gryllotalpa orientalis	Periplaneta americana	female	4.055	3.9658
Gryllotalpa orientalis	Periplaneta americana	female	4.1219	4.0312
Gryllotalpa orientalis	Gallus domesticus	female	4.2265	4.1335
Gryllotalpa orientalis	Gallus domesticus	female	4.1594	4.0679
Teleogryllus emma	Periplaneta americana	female	2.5688	2.5123
Teleogryllus emma	Periplaneta americana	female	2.6029	2.5456
Teleogryllus emma	Periplaneta americana	female	2.5673	2.5108
Teleogryllus emma	Periplaneta americana	female	2.5891	2.5321
Teleogryllus emma	Periplaneta americana	male	2.399	2.3462
Teleogryllus emma	Periplaneta americana	male	2.363	2.311
Teleogryllus emma	Periplaneta americana	male	2.2827	2.2325
Teleogryllus emma	Periplaneta americana	male	2.3207	2.2696
Teleogryllus emma	Gallus domesticus	female	2.6138	2.5563
Teleogryllus emma	Gallus domesticus	female	2.5539	2.4977
Teleogryllus emma	Gallus domesticus	female	2.5961	2.539
Teleogryllus emma	Gallus domesticus	female	2.7798	2.7186
Teleogryllus emma	Gallus domesticus	female	2.6334	2.5755
Loxoblemmus equestris	Periplaneta americana	female	2.4651	2.4109
Loxoblemmus equestris	Periplaneta americana	female	2.3755	2.3232
Loxoblemmus equestris	Periplaneta americana	female	2.5016	2.4466
Loxoblemmus equestris	Periplaneta americana	female	2.4422	2.3885
Gryllodes sigillatus	Periplaneta americana	female	2.2857	2.2354
Gryllodes sigillatus	Periplaneta americana	female	2.2662	2.2163
Gryllodes sigillatus	Periplaneta americana	female	2.2838	2.2336
Gryllodes sigillatus	Periplaneta americana	female	2.2481	2.1986
Gryllodes sigillatus	Periplaneta americana	male	2.0339	1.9892
Gryllodes sigillatus	Periplaneta americana	male	2.0817	2.0359
Gryllodes sigillatus	Periplaneta americana	male	2.0906	2.0446
Xenogryllus marmoratus	Periplaneta americana	female	2.3572	2.3053
Xenogryllus marmoratus	Periplaneta americana	female	2.3444	2.2928
Xenogryllus marmoratus	Periplaneta americana	male	1.9954	1.9515
Xenogryllus marmoratus	Periplaneta americana	male	2.024	1.9795
Xenogryllus marmoratus	Periplaneta americana	male	2.0564	2.0112
Xenogryllus marmoratus	Gallus domesticus	male	2.1572	2.1097
Xenogryllus marmoratus	Gallus domesticus	male	2.1549	2.1075
Xenogryllus marmoratus	Gallus domesticus	male	2.1351	2.0881
Truljalia hibinonis	Periplaneta americana	male	2.1777	2.1298
Truljalia hibinonis	Periplaneta americana	male	2.1699	2.1222
Truljalia hibinonis	Periplaneta americana	male	2.2953	2.2448
Truljalia hibinonis	Periplaneta americana	male	2.2748	2.2248
Oecanthus sinensis	Periplaneta americana	female	1.0905	1.0665
Oecanthus sinensis	Periplaneta americana	female	1.072	1.0484
Oecanthus sinensis	Periplaneta americana	male	0.9787	0.9572
Oecanthus sinensis	Periplaneta americana	male	0.9688	0.9475
Oecanthus sinensis	Periplaneta americana	male	0.9092	0.8892
Ornebius kanetataki	Gallus domesticus	female	3.4732	3.3968
Ornebius kanetataki	Gallus domesticus	female	3.4725	3.3961
Ornebius kanetataki	Gallus domesticus	female	3.5067	3.4296
Ornebius kanetataki	Gallus domesticus	male	3.1744	3.1046
Ornebius kanetataki	Gallus domesticus	male	3.0456	2.9786
Ornebius kanetataki	Gallus domesticus	male	3.027	2.9604
Diestrammena sp.	Periplaneta americana	female	5.4736	5.3532
Diestrammena sp.	Periplaneta americana	female	5.4795	5.359
Diestrammena sp.	Periplaneta americana	male	5.1122	4.9997
Diestrammena sp.	Periplaneta americana	male	5.1777	5.0638
Ocellarnaca sp.	Periplaneta americana	female	9.3061	9.1014
Ocellarnaca sp.	Periplaneta americana	female	9.5028	9.2937
Ocellarnaca sp.	Periplaneta americana	female	9.6003	9.3891
Ocellarnaca sp.	Periplaneta americana	female	9.3744	9.1682
Ocellarnaca sp.	Gallus domesticus	female	9.4737	9.2653

## Sheet: table S3
Table S3 Raw data of hind femur length and forewing length of specimens used in this study.
Species	Sex	Fore wing length (mm)	Hind femur length (mm)
Ruspolia lineosa	female	32.67	21.6
Ruspolia lineosa	female	35.7	24.34
Ruspolia lineosa	male	31.32	20.95
Ruspolia lineosa	male	36.08	20.69
Ruspolia lineosa	male	37.4	22.63
Ruspolia lineosa	male	37	23.71
Ruspolia dubia	female	29.56	20.81
Ruspolia dubia	female	31.64	19.18
Ruspolia dubia	male	29.69	18.03
Ruspolia dubia	male	29.91	18.19
Ruspolia dubia	male	32.39	18.55
Pseudorhynchus crassiceps	female	57.23	28.55
Pseudorhynchus crassiceps	male	58.5	23.2
Conocephalus melaenusa	female	15.5~19.2	14.0~17.0
Conocephalus melaenusa	male	15.8~19.5	14.1~15.8
Conocephalus gladiatus	female	21.87	16.55
Conocephalus gladiatus	female	20.99	14.67
Conocephalus gladiatus	female	18.71	15.7
Conocephalus gladiatus	male	17.53	13.96
Conocephalus gladiatus	male	14.43	12.17
Conocephalus gladiatus	male	14.77	12.22
Conocephalus maculatus	female	17.35	11.82
Conocephalus maculatus	female	17.6	11.23
Conocephalus maculatus	female	18.04	13.41
Conocephalus maculatus	female	19.36	13.08
Conocephalus maculatus	male	19.6	12.63
Conocephalus maculatus	male	18.03	12.46
Conocephalus maculatus	male	22.28	13.99
Metrioptera bonneti	female	3.48	17.52
Metrioptera bonneti	female	4.88	19.27
Metrioptera bonneti	female	5.11	16.16
Metrioptera bonneti	male	4.77	18.33
Metrioptera bonneti	male	5.74	15.64
Tettigonia chinensis	female	43.66	27.72
Tettigonia chinensis	male	38.62	21.39
Tettigonia chinensis	male	40.05	23.93
Atlanticus sinensisb	female	3.5~4.5	25.5~27.5
Atlanticus sinensis	male	7.85	26.49
Atlanticus sinensis	male	8.43	26.17
Atlanticus sinensis	male	8.43	26.4
Atlanticus sinensis	male	6.81	26.02
Gampsocleis sinensisb	female	43.5~46.5	36.0~41.0
Gampsocleis sinensisb	male	33.0~47.0	32.5~39.5
Elimaea berezovskii	female	28.25	19
Elimaea berezovskii	female	36.44	16.55
Elimaea berezovskii	male	27.23	17.97
Elimaea berezovskii	male	27.27	15.22
Kuwayamaea brachyptera	female	21.14	18.31
Kuwayamaea brachyptera	female	16.89	20.04
Kuwayamaea brachyptera	male	18.24	22.8
Kuwayamaea brachyptera	male	21.18	21.28
Kuwayamaea brachyptera	male	20.83	23.57
Kuwayamaea brachyptera	male	16.31	18.51
Phaneroptera gracilis	female	23.9	19.47
Phaneroptera gracilis	female	21.11	18.28
Phaneroptera gracilis	male	22.21	20.63
Phaneroptera gracilis	male	22.59	19.53
Phaneroptera gracilis	male	21.07	15.41
Ruidocollaris sinensis	female	61.19	25.18
Ruidocollaris sinensis	male	49.59	24.05
Ruidocollaris sinensis	male	42.68	21.51
Ruidocollaris sinensis	male	46.95	23.44
Ducetia japonica	female	23.93	19.23
Ducetia japonica	female	29.03	19.31
Ducetia japonica	male	23.01	17.92
Ducetia japonica	male	20.32	16.65
Ducetia japonica	male	22.03	17.04
Zichya tenggerensis	female	0	16.53
Zichya tenggerensis	female	0	16.95
Zichya tenggerensis	male	0	13.51
Zichya tenggerensis	male	0	13.77
Zichya tenggerensis	male	0	11.49
Deracantha onos	female	0	20.77
Deracantha onos	female	0	19.11
Deracantha onos	female	0	20.04
Deracantha onos	male	0	19.83
Deracantha onos	male	0	18.36
Deracantha onos	male	0	17.78
Microconema clavata	female	24.39	15.86
Microconema clavata	female	23.86	14.12
Microconema clavata	male	17.69	11.62
Microconema clavata	male	20.06	13.02
Tegra novaehollandiae viridinotata	female	47.97	19.01
Tegra novaehollandiae viridinotata	female	47.9	17.35
Tegra novaehollandiae viridinotata	female	48.48	17.05
Tegra novaehollandiae viridinotatac	male	39.0~40.0	15.0~17.0
Phyllomimus sinicusc	female	34.0~36.5	13.0~14.0
Phyllomimus sinicusc	male	30.0~33.0	11.0~13.0
Mecopoda elongata	female	48.81	37.53
Mecopoda elongata	female	43.86	35.59
Mecopoda elongata	female	48.21	38.76
Mecopoda elongata	male	47.03	36.05
Mecopoda elongata	male	47.3	35.23
Hexacentrus unicolor	female	28.07	20
Hexacentrus unicolor	male	24.51	19.31
Hexacentrus unicolor	male	25.77	18.92
a Jianfeng Wang. (2005). Systematic Study of the Family Conocephalidae from China (Orthoptera: Tettigonioidea) [D] (Doctoral dissertation, Hebei University).
b Na Ling. (2008). The Taxonomic Study on the Tettigonioidea of Northeast Area (Orthoptera: Ensifera) [D] (Doctoral dissertation, Northeast Normal University).
c Yongxia Wu. (2019). A Taxonomic Study on Pseudophyllinae from China (Orthoptera: Tettigoniidae) (Master's thesis, Hebei University).

## Sheet: table S4
Table S4 Species means of hind femur length and forewing length used in PGLS analyses (N = 22 species). N/A indicates absence of specimens to measure, in which case the lengths of the hind femur and forewing were obtained from the literature.
Species	Sex	Number	Fore wing length (mm)	Hind femur length (mm)
Ruspolia lineosa	female	2	34.19	22.97
	male	4	35.45	22
Ruspolia dubia	female	2	30.6	20
	male	3	30.66	18.26
Pseudorhynchus crassiceps	female	1	57.23	28.55
	male	1	58.5	23.2
Conocephalus melaenus	female	NA	17.35	15.5
	male	NA	17.65	14.95
Conocephalus gladiatus	female	3	20.52	15.64
	male	3	15.58	12.78
Conocephalus maculatus	female	4	18.09	12.39
	male	3	19.97	13.03
Metrioptera bonneti	female	3	4.49	17.65
	male	2	5.26	16.99
Tettigonia chinensis	female	1	43.66	27.72
	male	2	39.34	22.66
Atlanticus sinensis	female	NA	4	26.5
	male	4	7.88	26.27
Gampsocleis sinensis	female	NA	45	38.5
	male	NA	40	36
Elimaea berezovskii	female	2	32.35	17.78
	male	2	27.25	16.6
Kuwayamaea brachyptera	female	2	19.02	19.18
	male	4	19.14	21.54
Phaneroptera gracilis	female	2	22.51	18.88
	male	3	21.96	18.52
Ruidocollaris sinensis	female	1	61.19	25.18
	male	3	46.41	23
Ducetia japonica	female	2	26.48	19.27
	male	3	21.79	17.2
Zichya tenggerensis	female	2	0	16.74
	male	3	0	12.92
Deracantha onos	female	3	0	19.97
	male	3	0	18.66
Microconema clavata	female	2	24.13	14.99
	male	2	18.88	12.32
Tegra novaehollandiae viridinotata	female	3	48.12	17.8
	male	NA	39.5	16
Phyllomimus sinicus	female	NA	35.25	13.5
	male	NA	31.5	12
Mecopoda elongata	female	3	46.96	37.29
	male	2	47.17	35.64
Hexacentrus unicolor	female	1	28.07	20
	male	2	25.14	19.12

## Sheet: table S5
Table S5 Mitochondrial genome assembly statistics and Genbank accession numbers.
Species	Total reads	Total bases (bp)	Accession number (mitogenome)	Total length (bp)	Assembled reads	Average coverage (x)	A (bp)	T (bp)	C (bp)	G (bp)	AT_skew	GC_skew	AT_content	GC_content
Conocephalus gladiatus	13654034	4091292359	MT849265	15864	96706	897.5	5856	5337	2856	1815	0.0463683	-0.222864	0.70556	0.29444
Gampsocleis sinensis	13817267	4139512128	MT849267	15939	57652	390.1	5765	5039	3258	1874	0.0671973	-0.26968	0.677962	0.322038
Elimaea berezovskii	13960208	4180898199	MT849266	16232	68703	585.2	5887	5777	2803	1765	0.00943073	-0.227233	0.718581	0.281419
Ruidocollaris sinensis	15040955	4505518888	MT849268	16416	53694	477.4	6005	5861	3054	1496	0.0121355	-0.342418	0.722831	0.277169
Zichya tenggerensis	15060089	4509517220	MT849271	15641	36337	318.8	5687	5212	3089	1653	0.043582	-0.302826	0.696822	0.303178
Microconema clavata	14326069	4289209330	MT849272	15858	28962	258	5919	5287	3013	1639	0.0563984	-0.295357	0.706646	0.293354
Gryllodes sigillatus	18235819	5463254482	MT849273	16176	29156	266.7	6127	5327	3072	1638	0.0698446	-0.304459	0.708612	0.291388
Ocellarnaca sp.	13655284	4091042157	MT849269	16157	7696	68.5	6065	5547	2968	1577	0.044609	-0.306051	0.718698	0.281302
Diestrammena sp.	14465240	4330374824	MT849270	15297	38269	365.5	6396	5159	2195	1547	0.107053	-0.173169	0.755377	0.244623

## Sheet: table S6
Table S6 Mitochondrial genomes of Ensifera species and outgroups used for phylogenetic analyses in this study. The mitogenomes include those downloaded directly from GenBank (26), newly assembled in this study (9).
Superfamily	Family	Subfamily	Species	Accession number
Ingroup
Tettigonioidea	Tettigoniidae	Conocephalinae	Ruspolia lineosa	NC_033991.1
Tettigonioidea	Tettigoniidae	Conocephalinae	Ruspolia dubia	NC_009876.1
Tettigonioidea	Tettigoniidae	Conocephalinae	Pseudorhynchus crassiceps	NC_033990.1
Tettigonioidea	Tettigoniidae	Conocephalinae	Conocephalus melaenus	NC_033988.1
Tettigonioidea	Tettigoniidae	Conocephalinae	Conocephalus gladiatus	this study
Tettigonioidea	Tettigoniidae	Conocephalinae	Conocephalus maculatus	HQ711931.1
Tettigonioidea	Tettigoniidae	Tettigoniinae	Metrioptera bonneti	NC_033986.1
Tettigonioidea	Tettigoniidae	Tettigoniinae	Tettigonia chinensis	KX057727.1
Tettigonioidea	Tettigoniidae	Tettigoniinae	Atlanticus sinensis	MK903557
Tettigonioidea	Tettigoniidae	Tettigoniinae	Gampsocleis sinensis	this study
Tettigonioidea	Tettigoniidae	Phaneropterinae	Elimaea berezovskii	this study
Tettigonioidea	Tettigoniidae	Phaneropterinae	Kuwayamaea brachyptera	KT345950
Tettigonioidea	Tettigoniidae	Phaneropterinae	Phaneroptera gracilis	NC_034756.1
Tettigonioidea	Tettigoniidae	Phaneropterinae	Ruidocollaris sinensis	this study
Tettigonioidea	Tettigoniidae	Phaneropterinae	Ducetia japonica	NC_031652.1
Tettigonioidea	Tettigoniidae	Bradyporinae	Zichya tenggerensis	this study
Tettigonioidea	Tettigoniidae	Bradyporinae	Deracantha onos	NC_011813.1
Tettigonioidea	Tettigoniidae	Meconematinae	Microconema clavata	this study
Tettigonioidea	Tettigoniidae	Pseudophyllinae	Tegra novaehollandiae viridinotata	KX057715.1
Tettigonioidea	Tettigoniidae	Pseudophyllinae	Phyllomimus sinicus	NC_033997.1
Tettigonioidea	Tettigoniidae	Mecopodinae	Mecopoda elongata	NC_021380.1
Tettigonioidea	Tettigoniidae	Hexacentrinae	Hexacentrus unicolor	NC_033999.1
Gryllotalpoidea	Gryllotalpidae	Gryllotalpinae	Gryllotalpa orientalis	NC_006678.1
Grylloidea	Gryllidae	Gryllinae	Teleogryllus emma	NC_011823.1
Grylloidea	Gryllidae	Gryllinae	Loxoblemmus equestris	NC_030763
Grylloidea	Gryllidae	Gryllinae	Gryllodes sigillatus	this study
Grylloidea	Gryllidae	Eneopterinae	Xenogryllus marmoratus	NC_041236.1
Grylloidea	Gryllidae	Podoscirtinae	Truljalia hibinonis	NC_034797.1
Grylloidea	Gryllidae	Oecanthinae	Oecanthus sinensis	NC_034799.1
Grylloidea	Mogoplistidae	Mogoplistinae	Ornebius kanetataki	NC_039667.1
Rhaphidophoroidea	Rhaphidophoridae	Aemodogryllinae	Diestrammena sp.	this study
Stenopelmatoidea	Gryllacrididae	Gryllacridinae	Ocellarnaca sp.	this study
Outgroup
Pyrgomorphoidea	Pyrgomorphidae	Pyrgomorphinae	Atractomorpha sinensis	NC_011824.1
Tetrigoidea	Tetrigidae	Tetriginae	Tetrix japonica	NC_018543.1
Acridoidea	Acrididae	Oedipodinae	Locusta migratoria migratoria	NC_011119.1

## Sheet: table S7
Table S7 Comparison of genome size estimated by two different internal standards (PAM and GRBC).
Species	female						male
	Periplaneta americana (PAM)		Gallus domesticus (GRBC)		P-Vale		Periplaneta americana (PAM)		Gallus domesticus (GRBC)		P-Vale
	N	GS (pg) ± SE	N	GS (pg) ± SE			N	GS (pg) ± SE	N	GS (pg) ± SE
Conocephalus gladiatus	6	4.454 ± 0.029	4	4.673 ±0.070	0.011		3	3.994 ± 0.015	3	4.052 ± 0.041	0.257
Metrioptera bonneti	4	5.801 ± 0.062	4	5.991 ± 0.089	0.131		4	5.253 ± 0.040	4	5.424 ± 0.053	0.043
Kuwayamaea brachyptera	3	10.252 ± 0.095	4	10.821 ± 0.230	0.102		5	9.037 ± 0.062	4	9.077 ± 0.068	0.679
Deracantha onos	3	18.845 ± 0.152	3	19.425 ± 0.124	0.042
Mecopoda elongata	3	14.140 ± 0.211	3	15.022 ± 0.262	0.059
Teleogryllus emma	4	2.582 ± 0.009	5	2.635 ± 0.038	0.266

## Sheet: table S8
Table S8 Comparison of genome size between males and females.
Species	Female		Male		P-Value
	SZ (pg) ± SE	N	SZ (pg) ± SE	N
Ruspolia lineosa	9.828 ± 0.135	6	9.089 ± 0.095	6	0.01
Conocephalus gladiatus	4.541 ± 0.047	10	4.023 ± 0.023	6	0
Metrioptera bonneti	5.896 ± 0.061	8	5.339 ± 0.045	8	0
Elimaea berezovskii	6.680 ± 0.072	6	5.942 ± 0.110	5	0
Kuwayamaea brachyptera	10.577 ± 0.172	7	9.055 ± 0.043	9	0
Phaneroptera gracilis	6.113 ± 0.031	5	5.096 ± 0.037	9	0
Deracantha onos	19.135 ± 0.157	6	17.393 ± 0.115	5	0
Mecopoda elongata	14.581 ± 0.248	6	13.453 ± 0.119	7	0.01

## Sheet: table S9
Table S9 Results of the tests of phylogenetic signal using three methods (Abouheif’s C mean, Blomberg’s K, and Pagel’s λ).
Trait	Phylogenetic clade	Abouheif's Cmean	Pagel's λ	Blomberg's K
Genome size (female)	Ensifera	0.444**	1.028**	0.769**
Genome size (male)	Ensifera	0.440**	1.045**	0.770**
Genome size (female)	Tettigoniidae	0.221	1*	0.840*
Genome size (male)	Tettigoniidae	0.222	1*	0.854*
Forewing length (female)	Tettigoniidae	0.266*	1	0.799*
Forewing length (male)	Tettigoniidae	0.292*	1	0.801*
Body size (female)	Tettigoniidae	0.149	1	0.698
Body size (male)	Tettigoniidae	0.139	0.78	0.685
**, P < 0.01; *, P < 0.05

## Sheet: table S10
Table S10 Ordinary least squares (OLS) and phylogenetic generalized least squares (PGLS) regression analysis were used to study the relationship between genome size and forewing length or body size.
	Model	Type	P	r2
Female	Genome size ~ Forewing	OLS	0.08468	0.09838
	Genome size ~ Forewing	PGLS	0.213	0.03022
	Genome size ~ Body size	OLS	0.05015	0.1374
	Genome size ~ Body size	PGLS	0.09505	0.08974
Male	Genome size ~ Forewing	OLS	0.08053	0.1021
	Genome size ~ Forewing	PGLS	0.2372	0.02255
	Genome size ~ Body size	OLS	0.05981	0.1243
	Genome size ~ Body size	PGLS	0.06379	0.1195
